# Supplementary material for: Specificity, redundancy and dosage thresholds among gata4/5/6 genes during zebrafish cardiogenesis
Source: PubMed Central journal article supplement (PMC7327998; doi:10.1242/bio.053611), 2020-06-24
Supplement: biolopen-9-053611-s1.pdf [file biolopen-9-053611-s1.pdf]

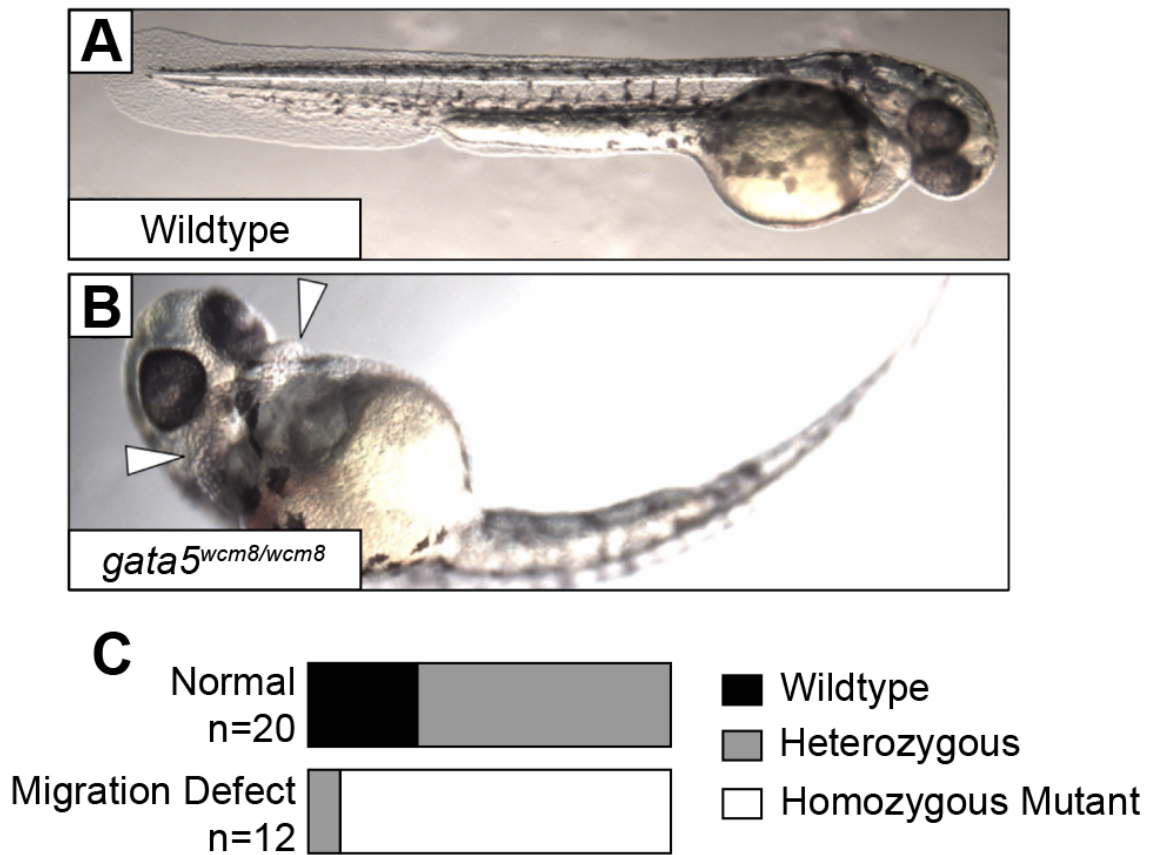

**Supplemental Figure S1. *Gata5* mutants exhibit *cardia bifida* by 2 dpf.** (A-B) *Gata5* homozygous mutant embryos exhibit *cardia bifida* (white arrowheads) and pericardial edema compared to wildtype embryos. (C) The *cardia bifida* phenotype is 100% penetrant among *gata5* homozygous mutant offspring collected from a cross of *gata5*<sup>+/-</sup> adults.

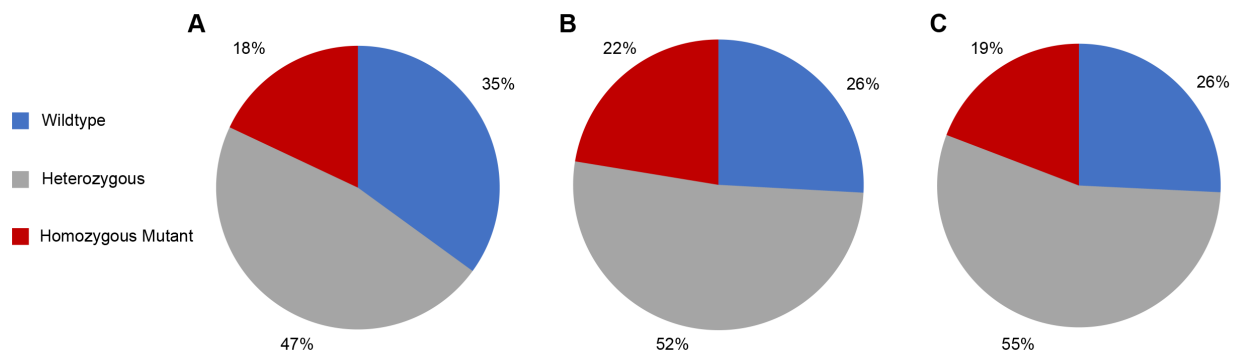

**Supplemental Figure S2. *Gata4* mutants are not recovered in expected ratios as**

**larvae or adults. (A) Percentage of wildtype, heterozygous, or homozygous mutant 3**

**dpf offspring obtained from crosses of *gata4*<sup>wcm5/+</sup> and *gata4*<sup>wcm6+/-</sup> adults (N=513). (B-C)**

**Percentage of each genotype found in adult offspring from crosses of *gata4*<sup>wcm5/+</sup> (B,**

**N=58) and *gata4*<sup>wcm6+/-</sup> (C, N=198) parents.**

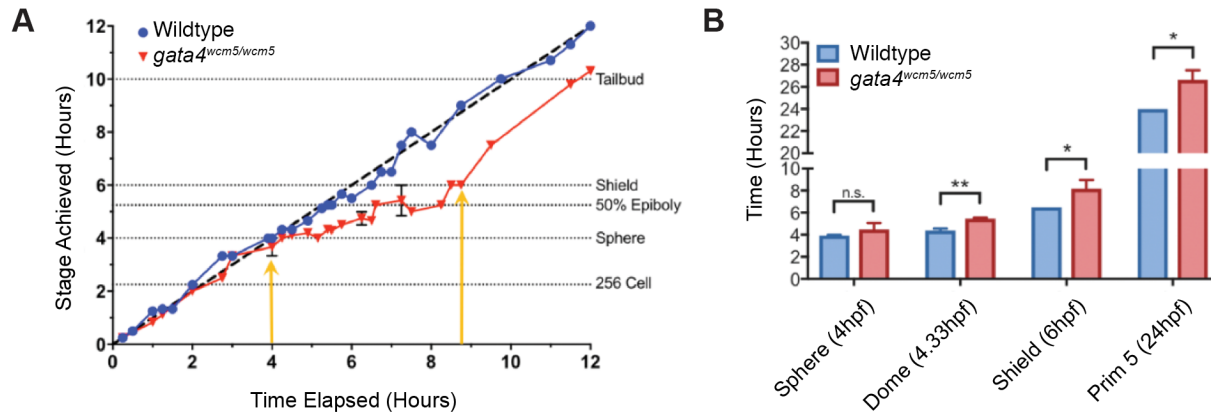

**Supplemental Figure S3. *Gata4* homozygous mutants undergo delayed**

**gastrulation.** (A) Schematic visualizing the length of time wildtype and mutant embryos take to reach each developmental stage. Points are mean time +/- S.D. and yellow lines mark the period of delay. (B) Quantification of time taken for embryos to reach specific stages of development (n=3 batches).

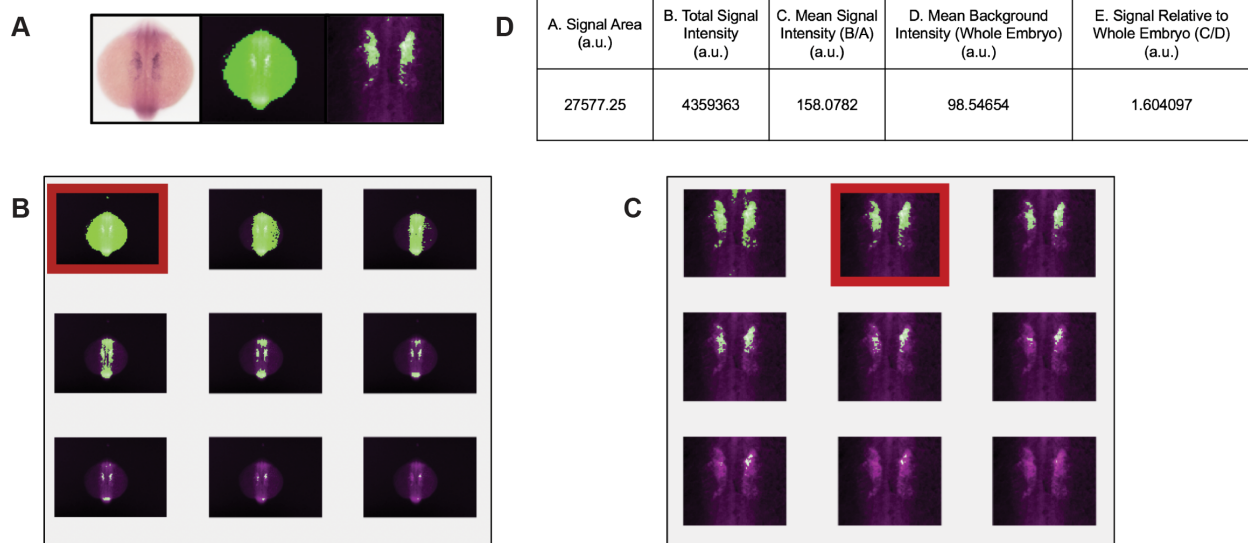

**Supplemental Figure S4. MATLAB quantification of ISH staining.** Quantification was performed using a custom MATLAB code with probe staining normalized to background staining of the whole embryo. (A) Representative example of original ISH image (left) compared to MATLAB quantified background staining (middle) and probe staining (right). (B-C) Examples of threshold levels set to quantify background and probe signal. (D) Example of output data with results from column E used to compare each mutant to wildtype.

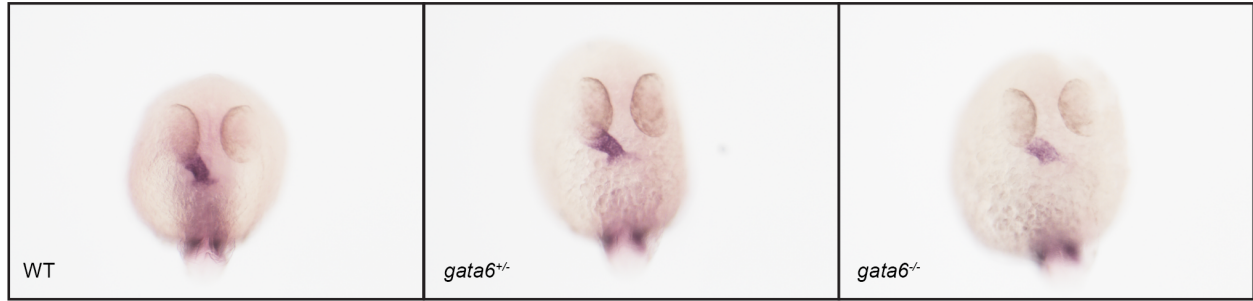

**Supplemental Figure S5. Reduced ventricular differentiation in *gata6* mutant embryos.** ISH performed at 26 hpf shows reduced expression of *vmhc* in *gata6*<sup>-/-</sup> embryos compared to wildtype (WT) or heterozygous siblings.

| CRISPR SEQUENCE |                                     |                                                                |
|-----------------|-------------------------------------|----------------------------------------------------------------|
| GENE            | gRNA TARGETED SEQUENCE (PAM)        |                                                                |
| <i>gata5</i>    | 5' - GGGCGCGAGTGTGTGAACTG (CGG) -3' |                                                                |
| TALEN SEQUENCES |                                     |                                                                |
| GENE            | TARGETED SEQUENCE                   | RVD SEQUENCES                                                  |
| <i>gata4</i>    | 5' -GCGTCCAGGCGGGTGG-3'             | NH HD NH NG HD HD NI NH<br>NH HD NH NH NH NG NH NH             |
|                 | 5' -GTCAGACTACCACAAC-3'             | NH NG NG NH NG NH NH NG<br>NI NH NG HD NG NH NI HD             |
| <i>gata6</i>    | 5' -CTTCCTCCCGGCGGATCGGA-3'         | HD NG NG HD HD NG HD HD<br>HD NH NH HD NH NH NI NG<br>HD NH NH |
|                 | 5' -TGTCAGACGAGCACCACAAC-3'         | NH NG NG NH NG NH NH NG<br>NH HD NG HD NH NG HD NG<br>NH NI HD |

**Supplemental Table 1. CRISPR and TALEN sequences.**

| ALLELE | GENE         | DNA SEQUENCE                                   |
|--------|--------------|------------------------------------------------|
| WT     | <i>gata4</i> | GGGTGGGTTTATCCTGCACAAACTGTCAGACT               |
| wcm5   | <i>gata4</i> | GGGTGGGT-----CAGACT                            |
| wcm6   | <i>gata4</i> | GGGTGGGTTTATAAACTGGGTTTACAAACTGT               |
| WT     | <i>gata5</i> | CCGTGTGAAGGGCGCGAGTGTGTGAACTGCGGCTCAATCTCAACGC |
| wcm8   | <i>gata5</i> | CCGTGTGAAGGGCGCGAGTGTG-----CTCAATCTCAACGC      |
| wcm9   | <i>gata5</i> | CCGTGTGA-----CCTGCGGCTCAATCTCAACGC             |
| wcm10  | <i>gata5</i> | CCGTGTGAAGGGCGCGAGTGTGTG-----ACGC              |
| wcm11  | <i>gata5</i> | CCGTGTGAAGGGCGCGAGTGTGT-----CAACGC             |
| WT     | <i>gata6</i> | GGACTGTGTCATGCGCAAACCTGTCAGACGAG               |
| wcm7   | <i>gata6</i> | GGACTGTCA-----GACGAG                           |

**Supplemental Table 2. *Gata4/5/6* mutant alleles and corresponding DNA sequences altered by TALEN (*gata4* and *gata6*) or CRISPR (*gata5*) mediated deletion of the GATA zinc finger DNA-binding domain.**

| GENOTYPING PRIMERS  |              |                            |
|---------------------|--------------|----------------------------|
| TE #                | GENE         | PRIMER SEQUENCE (5' to 3') |
| 6311<br>(Forward 1) | <i>gata4</i> | TTGCAGTGATTATTTATGCACATT   |
| 5995<br>(Forward 2) | <i>gata4</i> | GGTGGGTTTATCCTGCACA        |
| 6712<br>(Reverse)   | <i>gata4</i> | CAGCAGACAGGACACTCACC       |
| 6074<br>(Forward 1) | <i>gata5</i> | GGACTGTCATGCGCAAACCT       |
| 6346<br>(Forward 2) | <i>gata5</i> | AAATATTTGTGGAATTGATGATCC   |
| 6075<br>(Reverse)   | <i>gata5</i> | TGTTCAAAGCAAAGGGAGAG       |
| 6313<br>(Forward 1) | <i>gata6</i> | CGCGAGTGTGTGAACTGC         |
| 5994<br>(Forward 2) | <i>gata6</i> | CAAGTCGCACCTTGAAAACA       |
| 6711<br>(Reverse)   | <i>gata6</i> | TGGCTAGGTTTAAACAGGACAA     |

**Supplemental Table 3. Primer sequences for genotyping *gata4/5/6* mutant fish.**
